# Supplementary material for: Epigenetic Alterations of Repeated Relapses in Patient-matched Childhood Ependymomas
Source: PubMed Central journal article supplement (PMC9637194; doi:10.1038/s41467-022-34514-z), 2022-11-05
Supplement: 41467_2022_34514_MOESM3_ESM.pdf [file 41467_2022_34514_MOESM3_ESM.pdf]

**File Name:** Supplementary Data 1

**Description:** Summary of DNA methylation sequencing analysis.

**File Name:** Supplementary Data 2

**Description:** Correlation of DNA methylation profiles between this study and public data

**File Name:** Supplementary Data 3

**Description:** Summary of DMC status.

**File Name:** Supplementary Data 4

**Description:** List of potential driver DMCs of recurrence detected in the EPN tumors.

**File Name:** Supplementary Data 5

**Description:** Summary of DMRs in RELA and PFA tumors.

**File Name:** Supplementary Data 6

**Description:** Candidate driver genes associated with DMRs in RELA tumors.

**File Name:** Supplementary Data 7

**Description:** Candidate driver genes associated with DMRs in PFA tumors.

**File Name:** Supplementary Data 8

**Description:** List of DMR associated genes that were maintained or lost in the matching PDOX models in RELA and PFA ependymomas.

**File Name:** Supplementary Data 9

**Description:** List of DNA methylation booster associated genes that were maintained or lost in the matching PDOX models in RELA and PFA ependymomas.

**File Name:** Supplementary Data 10

**Description:** Differentially expressed genes driven by DNA methylation boosters during ependymoma relapses.
